# Supplementary material
Source: PubMed Central journal article supplement (PMC6052211)
Supplement: supp_RA118.001989_135423_1_supp_134599_p8gh6m.pdf [file supp_RA118.001989_135423_1_supp_134599_p8gh6m.pdf]

## SUPPORTING INFORMATION

Coupling of Smoothed to inhibitory G proteins reduces voltage-gated K<sup>+</sup> currents in cardiomyocytes and prolongs the cardiac action potential duration

**Lan Cheng<sup>1</sup>, Moza Al-Owais<sup>2</sup>, Manuel L. Covarrubias<sup>3</sup>, Walter J. Koch<sup>4</sup>, David. R. Manning<sup>5</sup>,  
Chris Peers<sup>2</sup>, and Natalia A. Riobo-Del Galdo<sup>1,6,\*</sup>**

### Index:

Supporting Figure 1  
Supporting Figure 2  
Supporting Figure 3  
Supporting Figure 4  
Supporting Figure 5  
Supporting Figure 6  
Supporting Figure 7  
Supporting Table 1

Fig. 1S

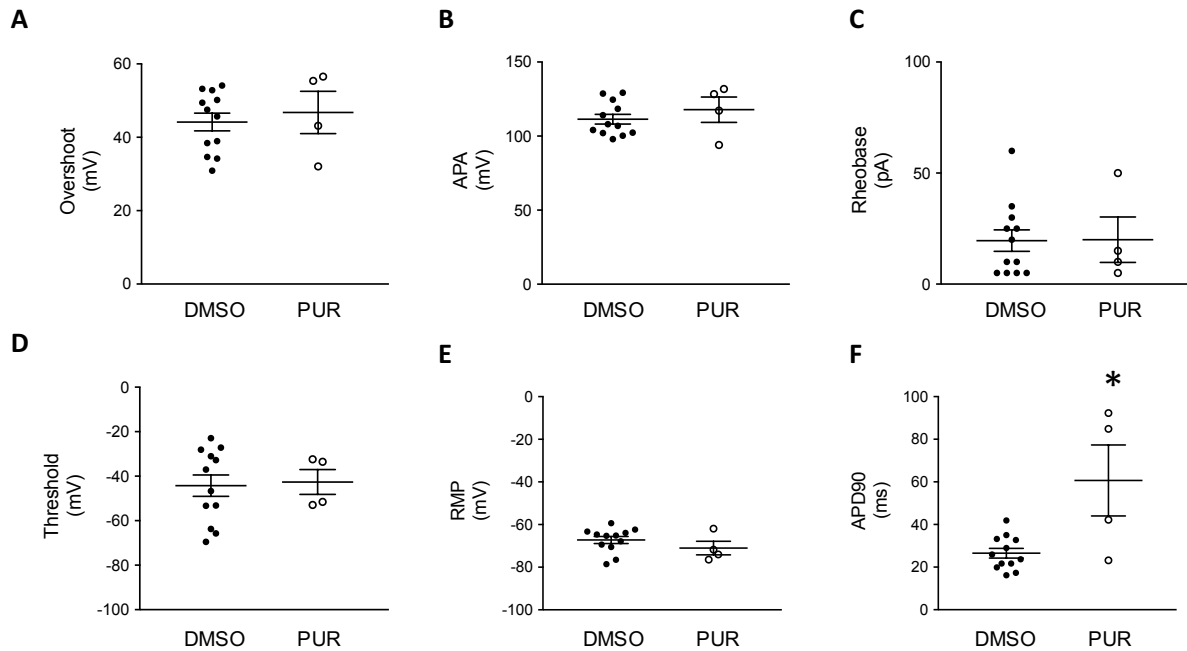

**Fig. 1S.** Action potential parameters in cardiomyocytes isolated from TTA mice after 10 min incubation with 0.1% DMSO or 5  $\mu$ M purmorphamine (PUR). Averaged data at 1 Hz for overshoot (A), maximal AP amplitude (APA) (B), rheobase (C), threshold (D), resting membrane potential (RMP) (E), and AP duration (APD) at 90% repolarization (APD90) (F). Data represent the mean  $\pm$  SEM ( $n=4-9$ ). \*  $P<0.05$

Fig. 2S

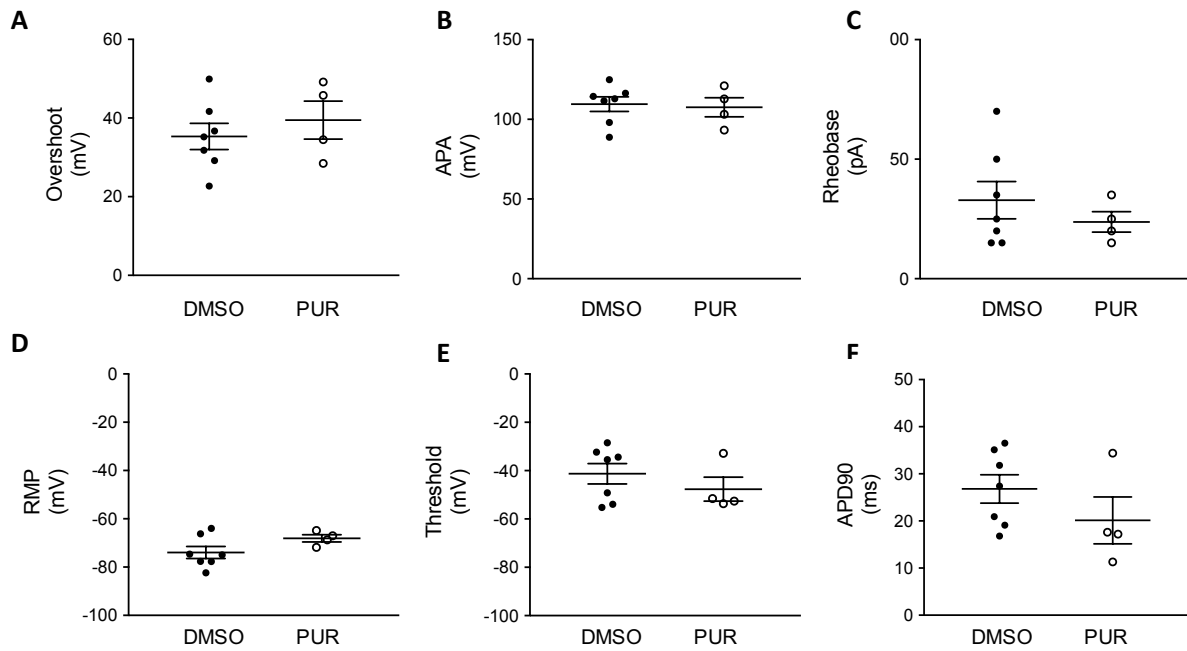

**Fig. 2S.** Action potential parameters in cardiomyocytes isolated from GiCT/TTA mice after 10 min incubation with 0.1% DMSO or 5  $\mu$ M pumorphamine (PUR). Averaged data at 1 Hz for overshoot (A), maximal AP amplitude (APA) (B), rheobase (C), threshold (D), resting membrane potential (RMP) (E), and AP duration (APD) at 90% repolarization (APD90) (F). Data represent the mean  $\pm$  SEM ( $n=4-9$ ).

Fig. 3S

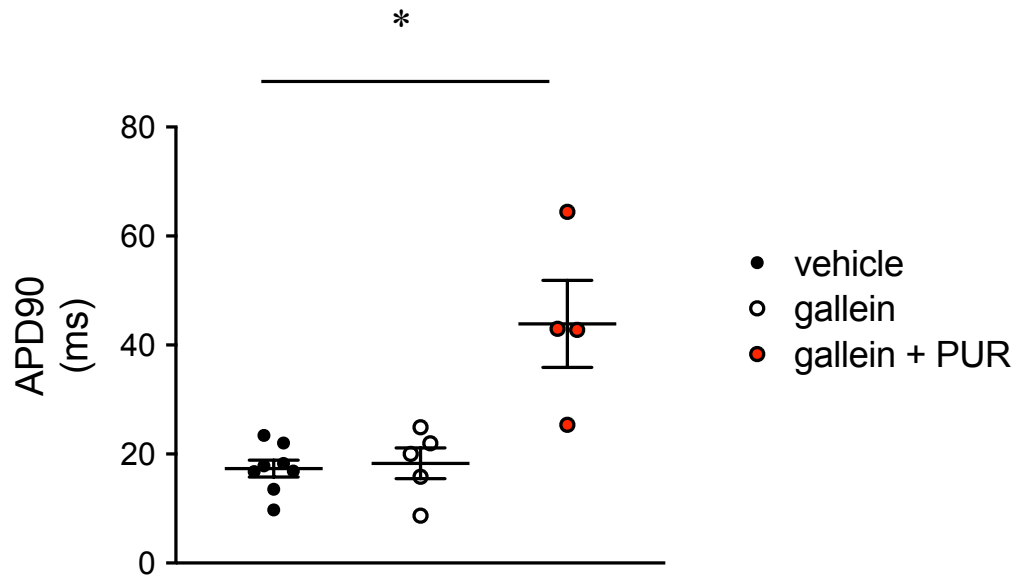

**Fig. 3S.** Action potential duration at 90% of action potential amplitude (APD90) of cardiomyocytes pre-treated with 50  $\mu$ M gallein for 10 min before addition of vehicle or 5  $\mu$ M purmorphamine (PUR) for 5 min. \*  $P < 0.001$  ( $n = 4-9$ ).

Fig. 4S

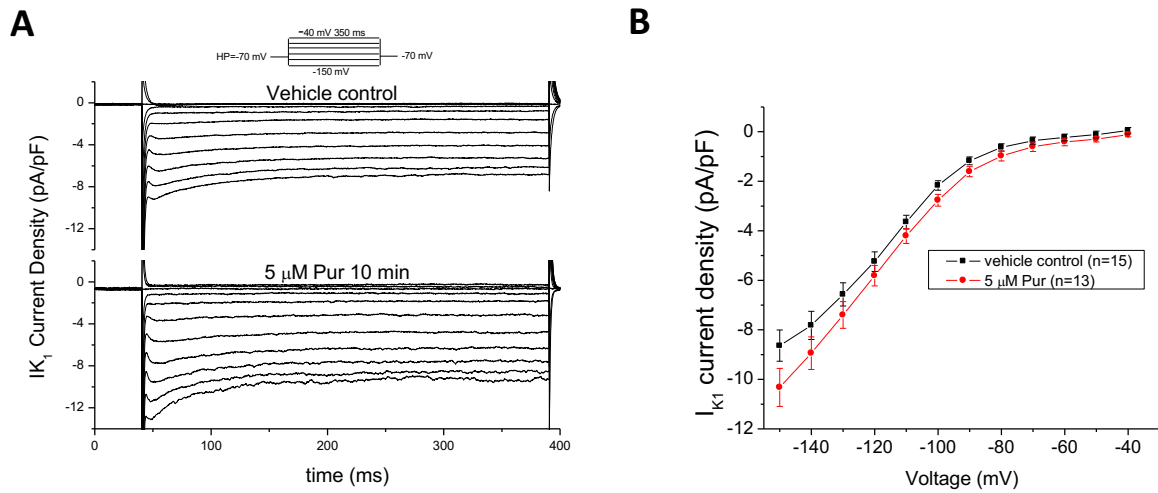

**Fig. 4S.** A. Representative whole-cell inwardly rectifying  $K^+$  currents, recorded at room temperature from vehicle control (DMSO) and 5  $\mu$ M purmorphamine (PUR)-treated ventricular myocytes in response to 350 ms depolarizing voltage steps to test potentials between  $-150$  mV and  $-40$  mV from a holding potential of  $-70$  mV. Recorded currents were normalized for differences in cell size (whole-cell membrane capacitance) to obtain current densities. B. Peak  $I_{K1}$  current densities as a function of voltage in vehicle-treated (black trace) vs. PUR-treated cardiomyocytes (red trace). Data are expressed as mean  $\pm$  SEM,  $n = 13-15$ .

Fig. 5S

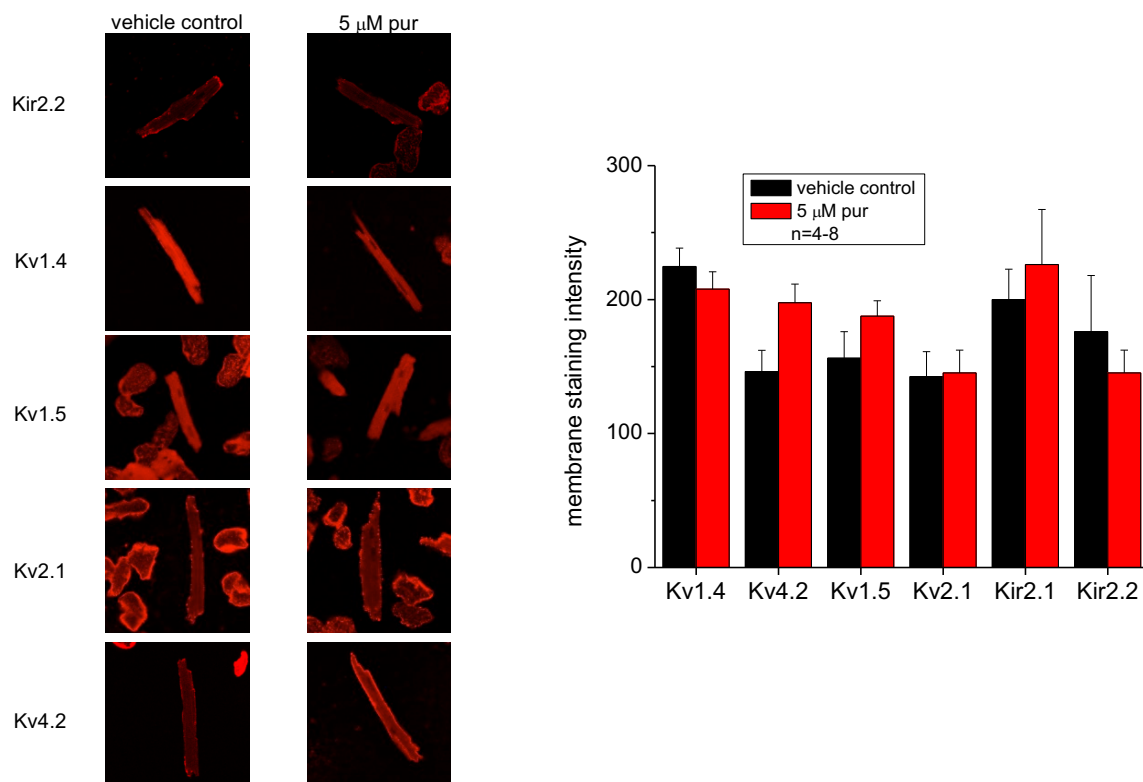

**Fig. 5S.** Immunofluorescent staining of indicated Kv channel subunits in fixed cardiomyocytes isolated from TTA or GiCT/TTA mice after 15 min incubation with 0.1% DMSO or 5 μM purmorphamine (PUR). Digital quantification of the Kv channel staining intensity at the plasma membrane in cells treated with 0.1% DMSO (vehicle, black bars) or 5 μM purmorphamine (PUR, red bars).

Fig. 6S

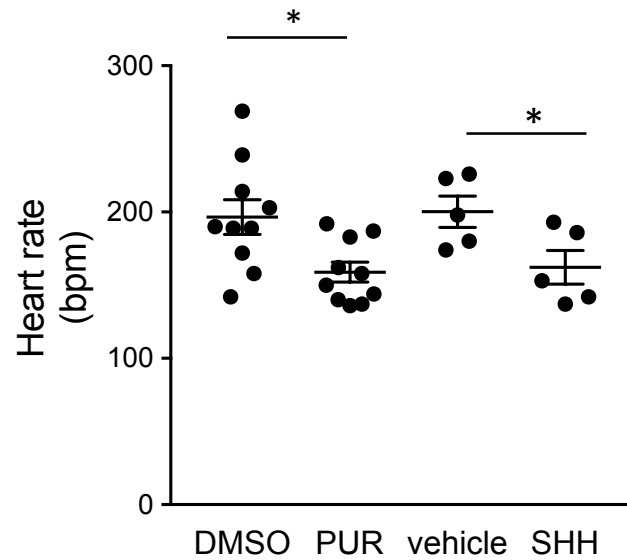

**Fig. 6S.** Spontaneous heart rate (HR) in isolated hearts from wild-type mice perfused with Tyrode's solution containing 0.1% DMSO (DMSO), 5  $\mu$ M purmorphamine (PUR), 20% DMEM (vehicle) or Shh in 20% DMEM (Shh) for 20 min. Data represent mean  $\pm$  SEM. One-tail t-test, \*  $P < 0.05$  DMSO vs. PUR (n=10-12) and vehicle vs. Shh (n=5).

Fig. 7S

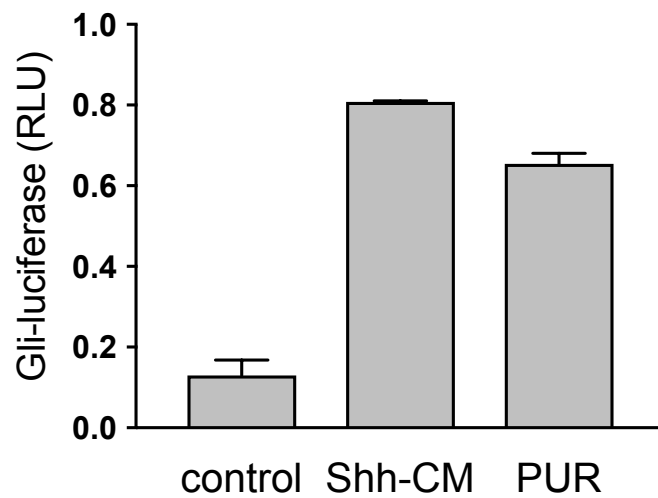

**Fig. 7S.** NIH 3T3 cells were transfected with 8XGli-*Firefly* luc and pTK-*Renilla* luc vectors as previously described (3). After 48 h, when cells were confluent, the growth medium was changed to DMEM with 0.5% FBS alone (control), Shh-conditioned medium (Shh-CM) at 1:5 dilution, or 5  $\mu$ M purmorphamine (PUR). Cells were lysed 24 h later and the Gli-luciferase activity (ratio of Firefly/*Renilla* luminescence) was measured on a T20/20 luminometer. Data represent mean  $\pm$  SEM.



Table S1

**Table S1. Baseline ECG analysis of hearts from TTA and GiCT/TTA mice.**

| <b>Parameter</b>        | <b>TTA (<i>n</i>=8)</b> | <b>GiCT/TTA (<i>n</i>=5)</b> |
|-------------------------|-------------------------|------------------------------|
| <b>HR (rpm)</b>         | 193 ± 14                | 152 ± 12                     |
| <b>PR interval (ms)</b> | 53.1 ± 5.9              | 59.7 ± 4.9                   |
| <b>QT interval (ms)</b> | 22.4 ± 3.0              | 24.9 ± 5.0                   |

Hearts from TTA or GiCT/TTA mice were perfused for 20 min in Tyrode's solution. Volume-conducted ECG was recorded and analysed as described in Materials and Methods.
